# Supplementary material for: Multilevel regulation of non‐photochemical quenching and state transitions by chloroplast NADPH‐dependent thioredoxin reductase
Source: PubMed Central journal article supplement (PMC6850073; doi:10.1111/ppl.12914), 2019-02-08
Supplement: PPL-166-211-s001.pdf [file PPL-166-211-s001.pdf]

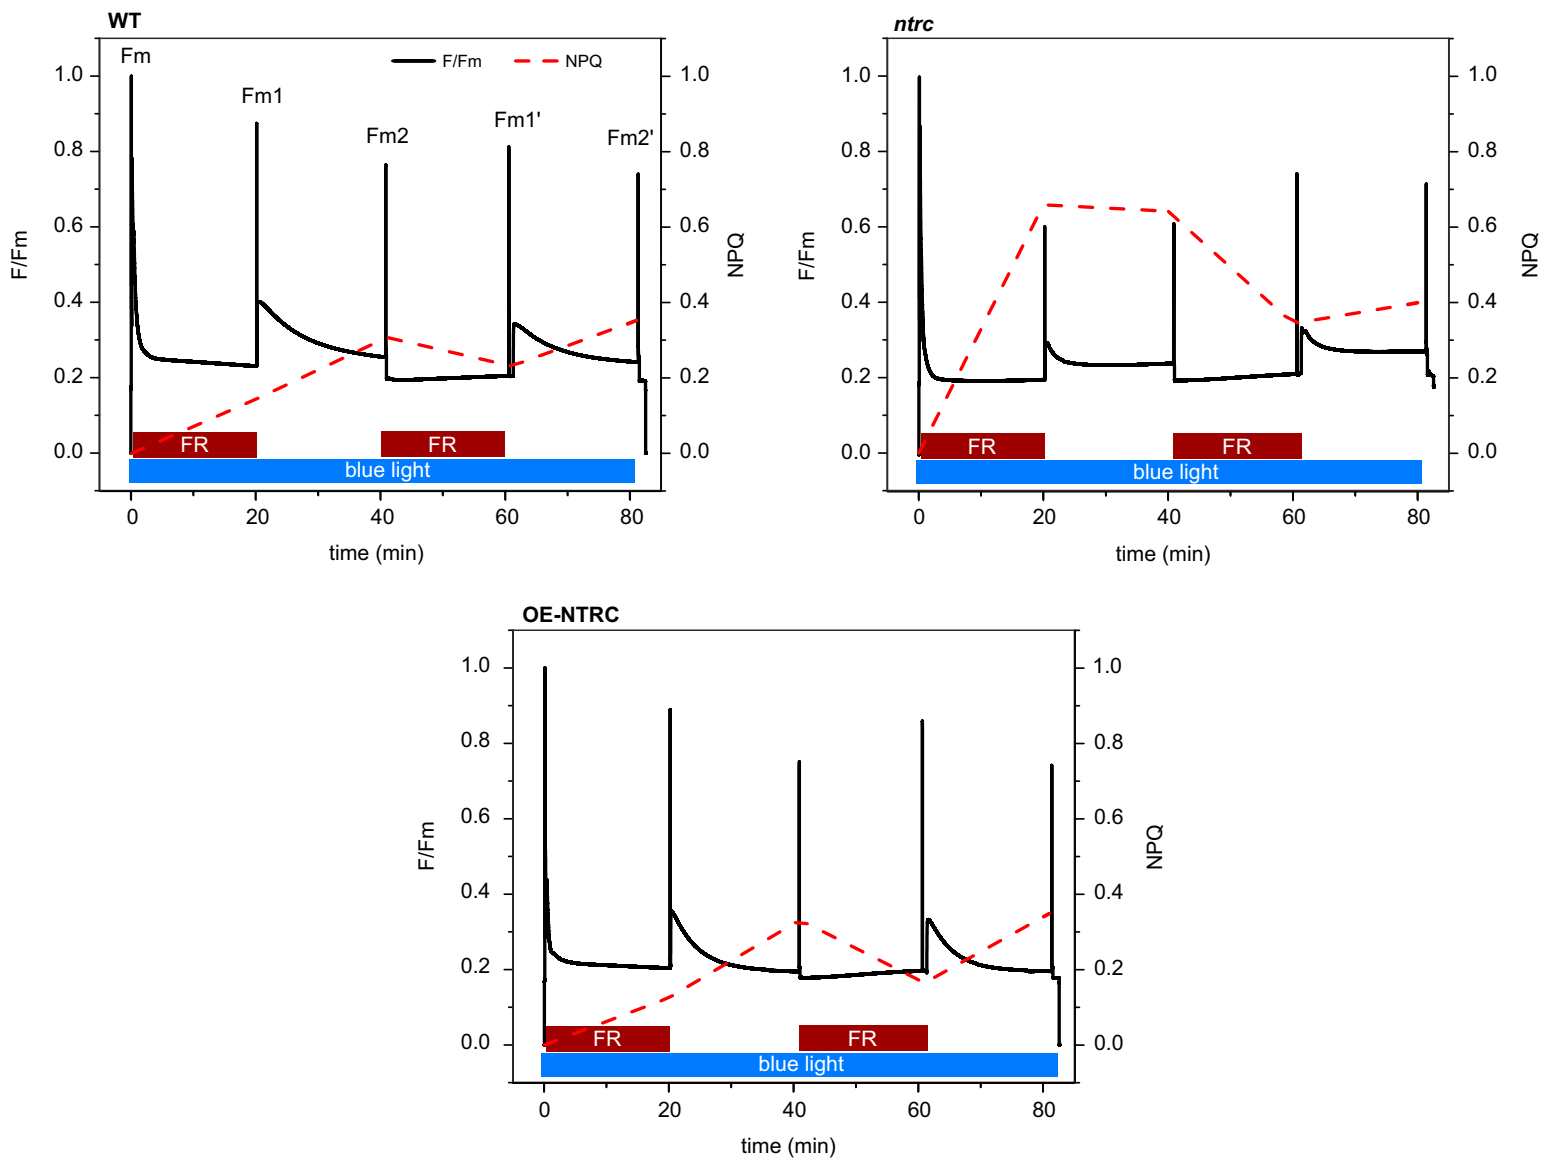

**Supplemental Figure S1.** Representative chlorophyll a fluorescence traces from experiments to determine state transition capacities of WT, *ntrc* and OE-NTRC leaves.

The *ntrc* mutant suffered from high NPQ in the low intensity of blue actinic light used in the experiment in Fig. 3C. In order to reliably determine  $q_T$  in *ntrc*, this experiment shown here was performed as in Fig. 3C, except that an additional 20 min illumination period with blue light ( $35 \mu\text{mol photons m}^{-2} \text{s}^{-1}$ ) supplemented with far red light (FR) was applied after the initial saturating pulse. The  $q_T$  parameter was calculated from the fluorescence difference between  $F_{m2}$  and  $F_{m1'}$  ( $q_T = (F_{m1'} - F_{m2}) / F_{m2}$ ). The values of  $q_T$  that were obtained from WT and OE-NTRC leaves were similar to the values obtained from the shorter experiment shown in Fig. 3C. Dotted lines depict the value of NPQ at the timepoints of saturating pulses. For each line, three individual leaves were measured.
